# Supplementary material
Source: publisher site journal article supplement (https://www.dovepress.com/article/282856)
Supplement: Supplementary file 1 [file get_supplementary_file.php]

# Schizophrenia treatment with second-generation antipsychotics: a multi-country evaluation of the costs of cardiovascular and metabolic adverse events and weight gain: appendices

## Appendix 1: Search terms.

### Search terms: clinical effectiveness review.

Database: Ovid MEDLINE(R) and Epub Ahead of Print, In-Process & Other Non-Indexed Citations and Daily <1946 to February 20, 2020>

Search Strategy:

--------------------------------------------------------------------------------

1. exp Schizophrenia/ (103095)
2. schizophreni$.ab,ti. (119905)
3. 1 or 2 (142011)
4. exp antipsychotic agents/ or aripiprazole/ or lurasidone hydrochloride/ or olanzapine/ or paliperidone palmitate/ or quetiapine fumarate/ or risperidone/ (122706)
5. antipsychotic.ab,ti. (29072)
6. cariprazine.af. (194)
7. (vraylar or reagila).af. (5)
8. F6RJL8B278.af. (97)
9. brexpiprazole.af. (182)
10. rexulti.af. (14)
11. 2J3YBM1K8C.af. (87)
12. quetiapine.af. (5046)
13. (seroquel or temprolid).af. (164)
14. S3PL1B6UJ.af. (0)
15. Quetiapine Fumarate/ (2729)
16. Olanzapine/ (5498)
17. olanzapine.af. (9102)
18. zyprexa.af. (69)
19. N7U69T4SZR.af. (5499)
20. Risperidone/ (6158)
21. risperidone.af. (9950)
22. risperdal.af. (78)
23. L6UH7ZF8H.af. (6158)
24. aripiprazole.af. (4146)
25. Aripiprazole/ (2326)
26. Abilify.af. (67)
27. Paliperidone Palmitate/ (819)
28. (invega or xeplio).af. (23)
29. paliperidone.af. (1353)
30. R8P8USM8F.af. (819)
31. Lurasidone Hydrochloride/ (233)
32. lurasidone.af. (448)
33. latuda.af. (14)
34. O0P4I5851I.af. (233)
35. ziprasidone.af. (1984)
36. (geodon or zeldox or zipwell).af. (31)
37. 6UKA5VEJ6X.af. (955)
38. lumateperone.af. (13)
39. caplyta.af. (1)
40. or/4-39 (134457)
41. 3 and 40 (35126)
42. (glucose or cholesterol or triglycerides or metabolic).ab,ti. (1055063)
43. exp Cardiovascular Diseases/ (2343351)
44. cardiovascular event$.ab,ti. (35379)
45. cvd event$.ab,ti. (2592)
46. dysmetabolism.ab,ti. (470)
47. hospitali?ation$.ab,ti. (151709)
48. "Hospitalization"/ (104022)
49. "length of stay"/ or patient admission/ or patient discharge/ or patient readmission/ (137173)
50. exp "Drug-Related Side Effects and Adverse Reactions"/ (113779)
51. Recurrence/ (180477)
52. (hospital adj3 (admission$ or readmission$ or discharge$ or "length of stay")).ab,ti. (106316)
53. (relapse$ adj3 rate$).ab,ti. (16838)
54. (recurrence$ adj3 rate$).ab,ti. (49341)
55. "time to hospitali?ation$".ab,ti. (2053)
56. "time to re-hospitali?ation$".ab,ti. (13)
57. "time to relapse$".ab,ti. (2785)
58. "time to recurrence$".ab,ti. (4968)
59. rehospitali?ation$.ab,ti. (5385)
60. (adverse effect$ or adverse event$).ab,ti. (294684)
61. or/42-60 (4079256)
62. 41 and 61 (9749)
63. Meta-Analysis/ (110932)
64. meta analy$.tw. (163609)
65. metaanaly$.tw. (2022)
66. meta analysis.pt. (110932)
67. (systematic adj (review$1 or overview$1)).tw. (161380)
68. exp Review Literature/ (2616190)
69. or/63-68 (2749551)
70. cochrane.ab. (78913)
71. embase.ab. (86191)
72. (psychlit or psyclit).ab. (914)
73. (psychinfo or psycinfo).ab. (33505)
74. (cinahl or cinhal).ab. (26863)
75. science citation index.ab. (3067)
76. bids.ab. (513)
77. cancerlit.ab. (628)
78. or/70-77 (141535)
79. reference list$.ab. (17422)
80. bibliograph$.ab. (17626)
81. hand-search$.ab. (6722)
82. relevant journals.ab. (1149)
83. manual search$.ab. (4332)
84. or/79-83 (42351)
85. selection criteria.ab. (29710)
86. data extraction.ab. (20118)
87. 85 or 86 (47566)
88. review.pt. (2610154)
89. 87 and 88 (28990)
90. comment.pt. (831379)
91. letter.pt. (1062740)
92. editorial.pt. (517935)
93. animal/ (6555603)
94. human/ (18294466)
95. 93 not (93 and 94) (4637548)
96. or/90-92,95 (6381753)
97. 69 or 78 or 84 or 89 (2776528)
98. 97 not 96 (2585825)
99. 62 and 98 (2095)
100. limit 99 to (english language and yr="2000 -Current") (1584)
101. network meta-analysis/ (1273)
102. ("network meta-analys$" or nma).af. (5396)
103. "Bayesian network meta-analysis".kw. (22)
104. "Network meta-analysis".kw. (1045)
105. 101 or 102 or 103 or 104 (5396)
106. 62 and 105 (19)
107. "indirect treatment comparison$".af. (245)
108. "indirect treatment comparison".kw. (51)
109. "indirect comparison$".af. (1747)
110. 107 or 108 or 109 (1902)
111. 62 and 110 (8)
112. 99 or 106 or 111 (2100)
113. limit 112 to (english language and yr="2000 -Current") (1589)

### Search terms: cost review.

Database: Ovid MEDLINE(R) and Epub Ahead of Print, In-Process & Other Non-Indexed Citations and Daily <1946 to February 18, 2020>

Search Strategy:

--------------------------------------------------------------------------------

1. exp Schizophrenia/ (103062)
2. schizophreni$.ab,ti. (120130)
3. 1 or 2 (142232)
4. exp Cardiovascular Diseases/ (2342382)
5. cardiovascular event$.ab,ti. (35469)
6. cvd event$.ab,ti. (2595)
7. dysmetabolism.ab,ti. (472)
8. hospitali?ation$.ab,ti. (152176)
9. "Hospitalization"/ (103958)
10. 4 or 5 or 6 or 7 or 8 or 9 (2530389)
11. 3 and 10 (9459)
12. Economics/ (27130)
13. "costs and cost analysis"/ (48161)
14. Cost allocation/ (2002)
15. Cost-benefit analysis/ (79461)
16. Cost control/ (21450)
17. cost savings/ (11645)
18. Cost of illness/ (26394)
19. Cost sharing/ (2490)
20. "deductibles and coinsurance"/ (1739)
21. Health care costs/ (38560)
22. Direct service costs/ (1181)
23. Drug costs/ (15816)
24. Employer health costs/ (1090)
25. Hospital costs/ (10818)
26. Health expenditures/ (19744)
27. Capital expenditures/ (1988)
28. Value of life/ (5682)
29. exp economics, hospital/ (24227)
30. exp economics, medical/ (14163)
31. Economics, nursing/ (3997)
32. Economics, pharmaceutical/ (2913)
33. exp "fees and charges"/ (30119)
34. exp budgets/ (13627)
35. (low adj cost).mp. (55403)
36. (high adj cost).mp. (14117)
37. (health?care adj cost$).mp. (11177)
38. (fiscal or funding or financial or finance).tw. (141853)
39. (cost adj estimate$).mp. (2218)
40. (cost adj variable).mp. (44)
41. (unit adj cost$).mp. (2471)
42. (economic$ or pharmacoeconomic$ or price$ or pricing).tw. (290798)
43. or/12-42 (710798)
44. 11 and 43 (701)
45. limit 44 to yr="2014 -Current" (193)
46. limit 44 to yr="2000 -Current" (512)
47. cariprazine.af. (194)
48. (vraylar or reagila).af. (5)
49. F6RJL8B278.af. (96)
50. brexpiprazole.af. (184)
51. rexulti.af. (14)
52. 2J3YBM1K8C.af. (87)
53. quetiapine.af. (5053)
54. (seroquel or temprolid).af. (164)
55. S3PL1B6UJ.af. (0)
56. Quetiapine Fumarate/ (2725)
57. Olanzapine/ (5494)
58. olanzapine.af. (9112)
59. zyprexa.af. (69)
60. N7U69T4SZR.af. (5495)
61. Risperidone/ (6151)
62. risperidone.af. (9970)
63. risperdal.af. (78)
64. L6UH7ZF8H.af. (6151)
65. aripiprazole.af. (4160)
66. Aripiprazole/ (2324)
67. Abilify.af. (68)
68. Paliperidone Palmitate/ (817)
69. (invega or xeplio).af. (23)
70. paliperidone.af. (1354)
71. R8P8USM8F.af. (817)
72. Lurasidone Hydrochloride/ (233)
73. lurasidone.af. (452)
74. latuda.af. (14)
75. O0P4I5851I.af. (233)
76. or/47-75 (21570)
77. 3 and 43 and 76 (483)
78. limit 77 to yr="2000 -Current" (417)
79. 46 or 78 (794)
80. ziprasidone.af. (1984)
81. (geodon or zeldox or zipwell).af. (30)
82. 6UKA5VEJ6X.af. (955)
83. lumateperone.af. (13)
84. caplyta.af. (1)
85. 80 or 81 or 82 or 83 or 84 (1998)
86. 3 and 43 and 85 (73)
87. limit 86 to yr="2000 -Current" (68)
88. 87 not 79 (4)
89. from 88 keep 1-4 (4)

## Appendix 2: Clinical evidence review, additional details.

**Review approach**

In order to identify the most relevant clinical evidence, a systematic review was undertaken to cover existing systematic reviews, meta-analyses, network meta-analyses (NMAs) and indirect treatment comparisons of randomised controlled trials (RCTs), published from the year 2000 onwards. Medline, Embase and the Cochrane Database of Systematic Reviews were searched in February 2020.

**Inclusion criteria**

The inclusion criteria for the clinical review evidence review were as follows:

- Population: Adults with schizophrenia (acute or stable)
- Interventions: 10 second-generation antipsychotics: aripiprazole, brexpiprazole, cariprazine, lumateperone, lurasidone, olanzapine, paliperidone, quetiapine, risperidone, ziprasidone.
- Comparators: Placebo or any of the 10 antipsychotics above
- Outcomes: Effectiveness and adverse effect outcomes as listed below
- Study types: Initial review: NMAs, indirect comparisons and meta-analyses of RCTs. Additional review to fill evidence gaps: RCTs, plus systematic reviews to identify RCTs.

The full list of the 33 outcomes considered in the clinical review is provided below:

- Relapses, recurrences, time to relapse, time to recurrence
- Hospital (re)admissions, hospital discharges, hospitalisation rate, time to hospitalisation, time to rehospitalisation, hospital length of stay
- Discontinuation (three outcomes: all cause, due to adverse events, due inefficacy)
- Weight change (absolute), weight change ≥ 7%, BMI change
- Type 2 diabetes rate
- Metabolic syndrome rate
- Lipids (four outcomes: high density lipoprotein cholesterol, low density lipoprotein cholesterol, total cholesterol, triglycerides)
- Fasting plasma glucose, HbA1c, insulin
- Prolactin elevation
- QTc interval prolongation, heart rate, blood pressure
- Stroke, myocardial infarction, tachycardia, arrhythmia.

**Study selection, mapping and data extraction**

Articles retrieved by the search were selected based on review of titles and abstracts, followed by review of full text articles. Articles reporting NMAs, indirect comparisons or meta-analyses were mapped in Excel by extracting brief methods, search date, population, interventions and outcomes reported. The most up-to-date analyses covering relevant interventions and reporting relevant outcomes were selected for full data extraction. Articles were not extracted further if they only reported interventions/outcomes that were covered in a more recent or more comprehensive analysis. Data were extracted by one researcher and checked by another.

Some evidence gaps remained after conducting the evidence review of NMAs and meta-analyses, therefore additional searches in PubMed and ClinicalTrials.gov were undertaken to identify individual RCTs to fill data gaps for interventions or outcomes not covered in existing NMAs or meta-analyses. Systematic reviews were also checked for relevant trials.

The PRISMA flow chart for the clinical evidence review is shown in Figure 1. The database search for systematic reviews, meta-analyses, NMAs and indirect treatment comparisons identified 2247 references, of which 2123 were excluded on examination of the titles/abstracts, and 124 full texts were examined for eligibility. Of these, 94 were excluded at the full-text stage or not mapped as they were superseded by a more recent or more comprehensive analysis, while 30 studies were mapped. In total, data were extracted for 10 studies. Finally, from the additional search to fill evidence gaps, 4 RCTs were included and data extracted.

Additional search for RCTs to fill evidence gaps
(n = 4 studies)

Full text RCTs data extracted
(n = 4 studies)

Records identified through database searching
(n = 2247)

Full-text articles assessed for eligibility
(n = 124)

Excluded at title/abstract
(n = 2123)

Full text articles mapped
(n = 30 studies)

Full-text articles excluded or not mapped
(n = 94)

Full text articles data extracted

(SLR, MA, NMA, ITC)
(n = 10 studies)

Full text articles mapped but not data extracted
(n = 20)

Figure 1: PRISMA flow chart for clinical evidence review

**Note:** Moher D, Liberati A, Tetzlaff J, Altman DG, Prisma Group. Preferred reporting items for systematic reviews and meta-analyses: the PRISMA statement. PLoS med. 2009 Jul 21;6(7):e1000097.92

Evidence on short-term outcomes was identified in seven NMAs 6,9,44-48, and a further nine meta-analyses 49-57. This was supplemented by evidence from two RCTs 22,23. For long-term outcomes five NMAs were identified 8,41,42,46,58, along with four meta-analyses 43,54,55,57 and two supplementary RCTs.

## Appendix 3: Risk modelling, data used.

Table 1 provides details of inputs that varied by country, along with the evidence sources used 6,19,27,59-65. Table 2 provides values that were assumed to be the same for all countries (due to a lack of evidence). The studies used were Pillinger 2020 for weight and height 6, and Barnett 2009 for metabolic outcomes apart from systolic blood pressure, which was from Zomer 2017 28,29. All other values were from QRisk 3 27.

Table 1: Country-specific inputs used for risk modelling.

|  | **France** | **Hungary** | **Italy** | **Slovenia** | **Spain** | **Sweden** | **UK** |
| --- | --- | --- | --- | --- | --- | --- | --- |
| Age | 42.65 | 43.75 | 30.90 | 43.75 | 46.80 | 39.90 | 40.47 |
| % Female | 33% | 50% | 59% | 50% | 42% | 43% | 32% |
| Source | Fefeu 2018 | Assume = Slovenia | Cortesi 2013 | Dernovsek 2001 | Sicras-Mainar 2014 | Lindstrom 2011 | Hodgson 2019 |
| Non-smoker | 58% | 56% | 60% | 61% | 58% | 66% | 61% |
| Former smoker | 20% | 19% | 20% | 20% | 19% | 22% | 20% |
| Light smoker | 12% | 14% | 11% | 10% | 13% | 7% | 10% |
| Moderate smoker | 6% | 7% | 5% | 5% | 6% | 3% | 5% |
| Heavy smoker | 4% | 5% | 3% | 3% | 4% | 2% | 3% |
| Source | QRisk3, OECD | QRisk3, OECD | QRisk3, OECD | QRisk3, OECD | QRisk3, OECD | QRisk3, OECD | QRisk3, OECD |
| Atrial fibrillation | 0.4% | 0.4% | 0.4% | 0.5% | 0.4% | 0.5% | 0.4% |
| CVD | 4.0% | 4.5% | 4.0% | 4.3% | 3.4% | 4.1% | 3.5% |
| CKD (3-5) | 0.4% | 0.6% | 0.5% | 0.6% | 0.4% | 0.5% | 0.4% |
| Type 1 diabetes | 0.2% | 0.3% | 0.3% | 0.3% | 0.3% | 0.3% | 0.3% |
| Type 2 diabetes | 1.1% | 1.7% | 1.5% | 1.3% | 1.4% | 1.6% | 1.3% |
| Treated hypertension | 7.7% | 23.1% | 20.9% | 20.1% | 6.0% | 7.8% | 4.9% |
| Rheumatoid arthritis | 0.6% | 0.4% | 0.5% | 0.5% | 0.5% | 0.7% | 0.8% |
| Source | QRisk3, GBD | QRisk3, GBD | QRisk3, GBD | QRisk3, GBD | QRisk3, GBD | QRisk3, GBD | QRisk3, GBD |

Table 2: Other inputs used for risk modelling.

| **Clinical characteristics** |  | **Medical characteristics:** |  | **Ethnicity** |  |
| --- | --- | --- | --- | --- | --- |
| Weight kg | 78.81 | Family history of CHD | 10.6% | White | 88.7% |
| Height m | 171.78 | Migraine | 4.6% | Indian | 2.0% |
| Fasting glucose mmol/L | 5.39 | Corticosteroid use | 1.9% | Pakistani | 1.1% |
| Total cholesterol mmol/L | 5.45 | HIV / AIDS | 0.2% | Bangladeshi | 0.9% |
| HDL-cholesterol. mmol/L | 1.32 | Systemic Lupus Erythematosus | 0.1% | Other Asian | 1.3% |
| LDL-cholesterol. mmol/L | 3.23 | Erectile dysfunction | 1.2% | Black Caribbean | 0.9% |
| Triglycerides. mmol/L | 2.20 | Family history of Diabetes | 14.9% | Black African | 1.9% |
| Systolic blood pressure (SBP). | 128.00 | Gestational diabetes | 0.4% | Chinese | 0.7% |
| Standard deviation of SBP | 9.59 | Polycystic ovary syndrome | 2.0% | Other Asian | 2.5% |
| Deprivation | 0.45 | Statin use | 6.4% |  |  |
|  |  | Learning disability | 0.7% |  |  |

## Appendix 4: Cost review, additional details.

A PRISMA flow chart is provided in Figure 2. When sifting based on title and abstract, there was no restriction by country. This was to ensure that, if country-specific costs / resource use were not available for an outcome, values for other countries could be used. The sift of full text initially focused on European countries. Based on the results of these full texts, data for the seven countries to use in the cost analysis were identified. It was decided that the available studies in general provided sufficient data, so with one exception the search was not extended to non-European studies. The one exception is when identifying costs for hyperprolactinaemia, for which due to uncertainty in the European data, evidence from non-European studies was also considered. All costs were inflated to 2018 costs using country-specific gross domestic product deflators 66.

Figure 2: PRISMA flow chart for cost review

Records identified through database searching
(n = 2417)

Articles retained after title sift
(n = 663)

Excluded based on title
(n = 1754)

Articles retained after abstract sift
(n = 383)

Excluded based on abstract
(n = 280)

European articles retained for full text review (n = 180)

Non-European articles

(n = 100)

Articles with relevant cost data
(n = 102)

Excluded, no cost data

(n = 78)

Of the 102 articles for which cost data could be extracted, there were the following articles amongst the countries of interest: France 6, Hungary 1, Italy 7, Slovenia 2, Spain 14, Sweden 9, UK 25. There were a further 7 studies that covered multiple European countries.

For studies that did not provide costs in the country’s currency, conversions were performed using purchasing power parities (conversions were performed before inflating) 67. When studies provided costs in Euros for multiple countries, these were assumed to relate to the collection of 28 European countries. An overview of the country-specific annual costs used in the analysis is provided in Table 3.

This following provides an overview of the identified resource use and costs by country. It also provides additional details on how the outcomes were implemented in the economic model.

### Weight gain.

Twelve studies were identified that included cost estimates of treating increased weight 10,12,13,15,17-20,33,34,37,40. A definition of weight gain was not provided in every study, but amongst those studies that did provide a definition, it was always an increase of at least 7% from baseline. Most economic evaluations assumed that weight gain occurred at any time and was irreversible. Cost estimates from the most recent studies were used. Consistent with the majority of economic evaluations, it was assumed that changes in weight gain persisted over a patient’s lifetime.

For the NICE CG178 economic evaluation, rates of weight gain were obtained from a *de novo* mixed treatment comparison 18. The results of this evidence synthesis were also used in the analysis of Garcia and colleagues 15. All other cost-effectiveness analyses used evidence from individual studies and summaries of product characteristics. For long-term clinical effectiveness evidence, the study by Millier *et al* was the only one that provided mean differences (and so could be used in the model). However, this study only provided values for three antipsychotics (olanzapine, quetiapine, ziprasidone) 8. Values for other antipsychotics were obtained from individual trials 68-71, with the exception of paliperidone. Rates of long-term weight gain for paliperidone were assumed to be the same as for risperidone, as the two treatments had the same probability of clinically significant weight gain in a previous network meta analysis18.

### Coronary heart disease (including myocardial infarction) and ischaemic stroke.

Five studies were identified that provided cost estimates for CHD 15,18,21,28,29. Three of these studies also provided cost estimates for stroke, no other studies provided stroke cost estimates. For all five studies, cost estimates were taken from the literature using costs of people in the general population with CHD or stroke. That is, there were no costs identified specific to people with schizophrenia (or a serious mental illness more generally) and any type of CHD or stroke. Three of the studies were UK based, one was Swedish and one Spanish. Of the subset providing stroke costs, two were UK based and one Spanish. All five studies used different sources for their cost estimates, and all used costs that were specific to their country. The three studies that provided stroke costs all included non-fatal ischaemic stroke. One study also provided costs for fatal stroke and transient ischaemic attack 28. Most studies provided separate costs for the first and subsequent years for the non-fatal types of CHD and non-fatal stroke.

Additional searches identified costs for CHD and stroke 72-76. Most of these studies provided separate costs for the first and subsequent years. Preference was given to the more recent studies. For Hungary, Slovenia and Sweden only a singly study was identified, so the costs for these were used 30,77,78. All CHD outcomes were modelled as chronic.

### Diabetes.

All of the identified studies used cost-estimates for diabetes (without a serious medical illness) taken from the literature. For example, Three UK studies used cost estimates from the UK Prospective Diabetes Study (UKPDS) which was not specific to an SMI population 12,18,29. When estimating the costs of diabetes, many studies noted the importance of not double-counting the costs of diabetes-related complications, such as stroke and heart disease.

A recent study was used for France, Italy, Spain and the UK 79. Costs for Slovenia and Hungary were taken from the only identified studies 30,77, whilst those for Sweden were taken from the “The Cost of Diabetes in Europe - Type II study” 80. Diabetes outcomes were modelled as chronic (after developing, they remained for a patient’s lifetime).

### Metabolic syndrome (including glucose intolerance).

Metabolic syndrome was considered in four studies, although only two of these included a treatment cost 15,18,21,38; in the two studies without a cost, developing metabolic syndrome increased the probability of developing diabetes (and hence cardiovascular diseases, as these were modelled as complications due to diabetes. Of the studies that attributed a cost, a Swedish study provided overall costs for the first and subsequent years of treatment 21. An Italian study provided costs for the components of treating metabolic syndrome (drug treatment, GP visits, glucose and lipid tests) but not the corresponding resource use 38. The higher costs in the Italian study may be because CHD is not separately considered, hence only the Swedish costs are considered. A conservative approach of using the lower year two costs for all years is adopted.

For implementing in the model, the definition of metabolic syndrome used in the Italian economic evaluation was used 38. For each time period the proportion of the cohort with each of the following outcomes was calculated:

- An increase in weight of more than 7% from baseline.
- A decrease in high-density lipoprotein cholesterol of more than 15% from baseline.
- An increase in triglycerides of at least 15% from baseline.
- An increase in fasting plasma glucose of at least 15% from baseline.

Each outcome was assumed to follow a Normal distribution with antipsychotic-specific standard errors. The fifth outcome was changes in blood pressure, but this was not considered due to a lack of evidence about any differential effect of antipsychotics on this. The proportion of the cohort experiencing metabolic syndrome (defined as at least three of the above outcomes) was calculated in two steps:

- The unadjusted rate of metabolic syndrome was taken to be the third largest of the values calculated for each outcome above.
- To avoid double-counting with other cardiometabolic outcomes, the proportion of the cohort with diabetes, CHD or both was removed from the unadjusted rate of metabolic syndrome. The resulting rate was used in the model and capped to not be less than zero.

Changes in metabolic outcomes were assumed to persist over a patient’s lifetime.

### Hyperprolactinaemia (prolactin elevation).

The costs associated with treating prolactin-related symptoms were presented in four studies. A French analysis provided an overall cost, which was assumed to be a one-off cost 37. A UK study assumed that hyperprolactinaemia would occur within a month of antipsychotic initiation and would require treatment with bromocriptine until the antipsychotic treatment were stopped 12. Additional costs due to healthcare visits were not explicitly linked to hyperprolactinaemia treatment, as they were assumed to already be included in the annual visits to GPs and psychiatrists (nine each). Similarly, a Swedish study, which modelled sexual dysfunction due to hyperprolactinaemia, did not apply an explicit cost, but assumed that this adverse event would increase rates of non-compliance and in-turn relapse rates, which did have a cost 19. A Spanish study assumed that sexual dysfunction due to hyperprolactinaemia would require one extra primary healthcare visit, although it was unclear if this extra visit was a one-off or occurred each month 20.

Due to the uncertainty in the available evidence, a search was made for resource use for hyperprolactinaemia amongst patients with schizophrenia in non-European studies. One U.S. study assumed that prolactin-related disorders (due to schizophrenia treatment) would result in two visits to an endocrinologist upon diagnosis, and a further two visits for the rest of the year 81. This assumption was used in a subsequent US-based cost-effectiveness analysis 82.

Guidelines on the management of hyperprolactinaemia suggest regular monitoring of prolactin levels, potential referral to an endocrinologist 83,84. As such, due to the uncertainty in the available evidence on hyperprolactinaemia costs, it was assumed that adverse events due to hyperprolactinaemia incur one GP visit every three months and one 1 endocrinologist visit a year. These only occurred whist patients were on antipsychotic treatment. It was estimated that a unit increase in prolactin elevation would be associated with an increase in adverse events of 0.14% 81.

### QTc interval prolongation.

The impact of having a prolonged QTc interval was assessed in one Swedish study 19. The observed resource use was on average one psychiatrist visit and one cardiologist visit over a six-month period. As country-specific costs of a cardiologist were not available, this cost was assumed to be the same as a psychiatrist; in the costs were similar (2806 SEK and 2539 SEK). It was assumed that treatment would be required with prolongation values of more than 10ms; mean differences followed a Normal distribution with antipsychotic-specific standard errors.

Table 3: Country-specific annual costs used in the analysis.

|  | **France (€)** | **Hungary (HUF)** | **Italy (€)** | **Slovenia (€)** | **Spain (€)** | **Sweden (SEK)** | **UK (£)** |
| --- | --- | --- | --- | --- | --- | --- | --- |
| **Weight gain** | 472 | 6,559 | 156 | 130 | 145 | 4,085 | 143 |
| **Diabetes** | 5,048 | 697,369 | 2,376 | 707 | 1,310 | 30,166 | 4,502 |
| **Fatal CV event** | 6,156 | 571,777 | 3,536 | 2,354 | 6,715 | 75,671 | 3,543 |
| **CV event Year 1** | 17,820 | 415,373 | 4,993 | 6,649 | 8,609 | 25,279 | 2,812 |
| **CV event Years 2+** | 2,474 | 161,704 | 4,375 | 282 | 7,023 | 19,758 | 1,169 |
| **Metabolic syndrome** | 733 | 134,056 | 663 | 552 | 616 | 8,564 | 666 |
| **Hyperprolactinaemia** | 130 | 11,462 | 134 | 47 | 228 | 7,591 | 278 |
| **QT prolongation** | 333 | 17,854 | 337 | 74 | 303 | 12,897 | 572 |
| **Stable disease** | 1,140 | 84,552 | 233 | 620 | 3,142 | 95,585 | 1,716 |
| **Relapse** | 10,363 | 547,332 | 1,193 | 7,597 | 6,265 | 147,329 | 7,286 |
| **Treatment switching** | 250 | 13,391 | 252 | 55 | 227 | 9,672 | 429 |

CVD: Cardiovascular.

### Schizophrenia management.

The focus was on studies that included the costs of treating a relapse as well as the costs for people who do not experience a relapse. Studies that provide a cost breakdown by compliance status were only included if no other country-specific costs were available. There was insufficient effectiveness evidence to differentiate between relapses that required a hospitalisation and relapses that did not, hence an overall cost of relapse was used.

For France, Hungary, Italy and Slovenia only a single study was identified (see Table 4). For France, costs were available for relapses with and without hospitalisations. The relapse costs were combined to give an overall cost assuming that two-thirds of relapses required hospitalisations, based on data observed in a Swedish study 10. The Hungarian study did not provide a cost for stable disease management. As such, UK-data on resource use was combined with Hungarian unit costs to provide an overall cost, with further inflation for the costs of outpatient appointments 12,36. For Italy, relapse costs only included hospitalisations. These were inflated by 18% as a large multi-European SOHO study of over 10,000 patients from nine countries estimated that 18% of the cost of a relapse was due to non-hospitalisation costs 36. The Slovenian study provided costs and rates of hospitalisations for patients based on compliance status (not relapse status). This was combined with a Swedish study, which assumed that 25% and 45% of compliant and non-compliant patients will relapse (respectively) to obtain costs by relapse status.

Two studies were identified for each of Spain and Sweden. One Spanish study assumed that there were no costs for the management of stable disease, so was excluded as being implausible 15. The remaining Spanish study only included hospitalisation costs, which were inflated using the SOHO dataset as previously described 85. Both Swedish studies derived costs from estimates of resource use 10,19. Only one used resource use estimates specific to Sweden, so this was retained. Six UK studies were identified. After inflating these costs to 2018 there was significant variation in estimates. An overview of costs are provided in Table 4. For comparison, these costs are reported in 2018 US $.

Table 4: Annual costs of management: stable schizophrenia and relapses 2018 US $.

| **Study** | **Country** | **Relapse** | **Stable** |
| --- | --- | --- | --- |
| Hong, 2009 (SOHO) 36 | European | 7,138 | 2,319 |
| Almond, 2004 86 | UK | 17,504 | 8,095 |
| Bagnall, 2003 87 | UK | 19,113 | 24,055 |
| Davies, 2008 12 | UK | 10,605 | 2,497 |
| NICE CG178 2014, Rajagopalan 2016 18,34 | UK | 47,812 | 7,862 |
| Tilden, 2002 88 | UK | 22,965 | 765 |
| Arteaga 2019 37 | France | 13,707 | 1,508 |
| Nemeth 2019 33 | Hungary | 3,960 | 612 |
| Cortesi 2013 59 | Italy | 1,746 | 341 |
| Obradavic 2007 17 | Slovenia | 13,352 | 1,089 |
| Dilla 2014 85 | Spain | 6,265 | 3,142 |
| Lindstrom 2011 19 | Sweden | 16,687 | 10,826 |

Of the UK estimates of relapse cost, those from the NICE clinical guidance (which form the basis of the costs used in Rajagopalan 2016) appear implausible high when compared with alternative estimates. After excluding these, the most recent cost estimates are from Davies 2008, which were used for the UK. The costs of treatment switching were included in two studies, both of which assumed that this would require an average of three Psychiatrist visits, hence this was used in the model 18,34.

The effectiveness for rates of discontinuation and relapses were implemented in the model as relative risks, and so required absolute values for placebo. For discontinuation in the acute and stable phase values of 36.9% and 11.0% were used 18,55. For relapse an annual rate of 64.2% was used 89.

### Antipsychotic costs.

Antipsychotic doses during the acute phase were based on the daily defined doses as supplied by the World Health Organisation 90. There was little evidence on the doses used in practice for the maintenance phase. For aripiprazole, evidence from the British National Formulary suggest a typical monthly dose of 400mg for maintenance, compared with a daily dose of 15mg for the acute phase 91. This results in maintenance dosing being 0.88% of the acute dose; this ratio was assumed to hold for all the antipsychotics.

## Appendix 5: Additional results.

Table 5: Lifetime costs; patients initiating acute treatment.

| **FRANCE** | **Total** | **DM** | **Met. Synd.** | **CVD Yr1** | **CVD Yr2+** | **DM + (CVD Yr1)** | **DM + (CVD Yr2)** | **Death: CVD** | **Weight gain** | **Prolact. AE** | **QT AE.** | **On 1st line Tx** | **Relapse, 1st line** | **Discont. 1st line** | **Subs. Tx** | **Stable disease** |
| --- | --- | --- | --- | --- | --- | --- | --- | --- | --- | --- | --- | --- | --- | --- | --- | --- |
| Lurasidone | 60,504 | 8,842 | 25 | 5,228 | 8,407 | 1,332 | 6,578 | 6,027 | 929 | 4 | 0 | 1,010 | 17,115 | 111 | 1,081 | 3,814 |
| Aripiprazole | 82,391 | 19,692 | 0 | 4,328 | 6,527 | 2,919 | 14,333 | 6,389 | 1,546 | 0 | 0 | 322 | 21,036 | 135 | 1,296 | 3,866 |
| Brexpiprazole | 85,697 | 23,094 | 0 | 4,048 | 5,977 | 3,377 | 16,528 | 6,480 | 3,538 | 1 | 0 | 393 | 17,366 | 94 | 1,062 | 3,739 |
| Cariprazine | 89,945 | 24,871 | 25 | 3,897 | 5,665 | 3,622 | 17,686 | 6,517 | 1,994 | 0 | 0 | 478 | 20,023 | 119 | 1,231 | 3,815 |
| Olanzapine | 108,267 | 32,396 | 2,570 | 3,472 | 4,780 | 4,905 | 24,299 | 7,206 | 8,941 | 2 | 0 | 290 | 14,653 | 90 | 912 | 3,751 |
| Paliperidone | 86,969 | 22,814 | 0 | 4,125 | 6,119 | 3,389 | 16,682 | 6,584 | 5,056 | 26 | 0 | 961 | 16,146 | 124 | 1,045 | 3,898 |
| Quetiapine | 88,911 | 21,922 | 939 | 4,271 | 6,387 | 3,343 | 16,595 | 6,714 | 5,111 | 0 | 0 | 697 | 17,937 | 105 | 1,104 | 3,786 |
| Risperidone | 84,163 | 20,891 | 0 | 4,281 | 6,437 | 3,114 | 15,351 | 6,520 | 4,851 | 20 | 0 | 222 | 17,433 | 114 | 1,096 | 3,834 |
| Ziprasidone | 67,714 | 13,966 | 38 | 4,746 | 7,393 | 2,068 | 10,142 | 6,114 | 513 | 1 | 398 | 858 | 16,558 | 102 | 1,041 | 3,776 |
| Lumateperone | 94,115 | 15,938 | 0 | 4,621 | 7,147 | 2,360 | 11,604 | 6,239 | 2,443 | 0 | 0 | 21,386 | 17,350 | 112 | 1,074 | 3,841 |
| **HUNGARY** | **Total** | **DM** | **Met. Synd.** | **CVD Yr1** | **CVD Yr2+** | **DM + (CVD Yr1)** | **DM + (CVD Yr2)** | **Death: CVD** | **Weight gain** | **Prolact. AE** | **QT AE.** | **On 1st line Tx** | **Relapse, 1st line** | **Discont. 1st line** | **Subs. Tx** | **Stable disease** |
| Lurasidone | 4,020,850 | 962,422 | 8,447 | 93,207 | 365,157 | 46,347 | 460,484 | 482,095 | 10,759 | 329 | 0 | 240,653 | 896,318 | 5,884 | 167,522 | 281,227 |
| Aripiprazole | 5,863,345 | 2,196,729 | 82 | 78,731 | 289,102 | 104,244 | 1,029,409 | 514,135 | 17,858 | 0 | 0 | 38,524 | 1,101,770 | 7,159 | 200,811 | 284,791 |
| Brexpiprazole | 6,221,213 | 2,578,436 | 10 | 74,221 | 266,923 | 120,907 | 1,190,798 | 522,301 | 40,754 | 44 | 0 | 71,775 | 909,719 | 4,998 | 164,609 | 275,719 |
| Cariprazine | 6,760,236 | 2,791,127 | 9,460 | 71,597 | 253,486 | 130,280 | 1,279,688 | 525,824 | 23,030 | 0 | 0 | 148,815 | 1,048,774 | 6,285 | 190,810 | 281,061 |
| Olanzapine | 8,424,887 | 3,659,285 | 633,745 | 65,526 | 219,571 | 178,806 | 1,775,374 | 585,244 | 103,104 | 209 | 0 | 13,858 | 767,378 | 4,760 | 141,282 | 276,745 |
| Paliperidone | 6,279,349 | 2,545,308 | 29 | 75,756 | 273,626 | 121,383 | 1,201,174 | 530,977 | 58,266 | 2,264 | 1 | 169,298 | 845,217 | 6,611 | 161,967 | 287,473 |
| Quetiapine | 6,385,937 | 2,448,435 | 245,960 | 78,463 | 285,440 | 119,936 | 1,194,891 | 541,736 | 58,957 | 0 | 0 | 16,835 | 939,500 | 5,563 | 171,100 | 279,120 |
| Risperidone | 5,862,550 | 2,324,504 | 30 | 78,310 | 286,701 | 111,196 | 1,101,888 | 525,250 | 55,916 | 1,772 | 0 | 5,497 | 912,897 | 6,070 | 169,882 | 282,638 |
| Ziprasidone | 4,695,375 | 1,545,384 | 12,974 | 85,217 | 323,484 | 73,070 | 721,373 | 490,088 | 5,960 | 128 | 21,350 | 103,860 | 867,209 | 5,420 | 161,380 | 278,476 |
| Lumateperone | 8,869,189 | 1,760,828 | 24 | 83,504 | 314,658 | 83,490 | 825,988 | 500,893 | 28,181 | 0 | 0 | 3,907,606 | 908,526 | 5,949 | 166,356 | 283,188 |
| **ITALY** | **Total** | **DM** | **Met. Synd.** | **CVD Yr1** | **CVD Yr2+** | **DM + (CVD Yr1)** | **DM + (CVD Yr2)** | **Death: CVD** | **Weight gain** | **Prolact. AE** | **QT AE.** | **On 1st line Tx** | **Relapse, 1st line** | **Discont. 1st line** | **Subs. Tx** | **Stable disease** |
| Lurasidone | 39,828 | 6,909 | 22 | 1,447 | 15,490 | 569 | 7,681 | 2,347 | 439 | 4 | 0 | 914 | 2,001 | 114 | 1,102 | 789 |
| Aripiprazole | 54,843 | 15,693 | 0 | 1,134 | 11,513 | 1,255 | 16,931 | 2,572 | 733 | 0 | 0 | 290 | 2,459 | 139 | 1,321 | 801 |
| Brexpiprazole | 59,545 | 18,414 | 0 | 1,041 | 10,386 | 1,449 | 19,593 | 2,638 | 1,685 | 1 | 0 | 355 | 2,030 | 97 | 1,083 | 773 |
| Cariprazine | 61,538 | 19,813 | 15 | 991 | 9,750 | 1,550 | 20,874 | 2,660 | 947 | 0 | 0 | 433 | 2,341 | 122 | 1,255 | 790 |
| Olanzapine | 78,386 | 25,813 | 1,561 | 837 | 7,881 | 2,087 | 28,885 | 3,029 | 4,253 | 2 | 0 | 527 | 1,714 | 93 | 930 | 775 |
| Paliperidone | 61,088 | 18,202 | 0 | 1,062 | 10,656 | 1,457 | 19,832 | 2,686 | 2,406 | 27 | 0 | 870 | 1,889 | 128 | 1,066 | 806 |
| Quetiapine | 61,545 | 17,516 | 651 | 1,105 | 11,168 | 1,441 | 19,752 | 2,737 | 2,430 | 0 | 0 | 631 | 2,097 | 108 | 1,126 | 783 |
| Risperidone | 58,202 | 16,659 | 0 | 1,115 | 11,317 | 1,341 | 18,252 | 2,645 | 2,309 | 21 | 0 | 475 | 2,039 | 118 | 1,118 | 793 |
| Ziprasidone | 46,217 | 11,059 | 29 | 1,281 | 13,343 | 888 | 11,899 | 2,412 | 241 | 2 | 403 | 776 | 1,936 | 105 | 1,061 | 781 |
| Lumateperone | 68,497 | 12,659 | 0 | 1,237 | 12,831 | 1,017 | 13,729 | 2,487 | 1,162 | 0 | 0 | 19,342 | 2,029 | 115 | 1,095 | 794 |
| **SLOVENIA** | **Total** | **DM** | **Met. Synd.** | **CVD Yr1** | **CVD Yr2+** | **DM + (CVD Yr1)** | **DM + (CVD Yr2)** | **Death: CVD** | **Weight gain** | **Prolact. AE** | **QT AE.** | **On 1st line Tx** | **Relapse, 1st line** | **Discont. 1st line** | **Subs. Tx** | **Stable disease** |
| Lurasidone | 24,459 | 1,194 | 24 | 1,892 | 889 | 409 | 775 | 2,319 | 249 | 1 | 0 | 992 | 12,573 | 25 | 1,041 | 2,076 |
| Aripiprazole | 29,665 | 2,712 | 0 | 1,569 | 692 | 914 | 1,728 | 2,467 | 415 | 0 | 0 | 330 | 15,453 | 30 | 1,248 | 2,105 |
| Brexpiprazole | 27,919 | 3,178 | 0 | 1,470 | 636 | 1,057 | 1,993 | 2,503 | 949 | 0 | 0 | 296 | 12,757 | 21 | 1,023 | 2,035 |
| Cariprazine | 30,429 | 3,439 | 26 | 1,413 | 601 | 1,139 | 2,143 | 2,520 | 535 | 0 | 0 | 614 | 14,708 | 26 | 1,186 | 2,077 |
| Olanzapine | 32,193 | 4,468 | 2,043 | 1,267 | 512 | 1,541 | 2,942 | 2,787 | 2,400 | 1 | 0 | 527 | 10,765 | 20 | 878 | 2,041 |
| Paliperidone | 28,621 | 3,133 | 0 | 1,500 | 652 | 1,059 | 2,007 | 2,542 | 1,357 | 9 | 0 | 1,344 | 11,862 | 28 | 1,007 | 2,122 |
| Quetiapine | 29,710 | 3,011 | 782 | 1,553 | 680 | 1,044 | 1,995 | 2,591 | 1,372 | 0 | 0 | 358 | 13,177 | 23 | 1,063 | 2,061 |
| Risperidone | 27,919 | 2,864 | 0 | 1,556 | 685 | 971 | 1,843 | 2,516 | 1,302 | 7 | 0 | 201 | 12,806 | 25 | 1,056 | 2,087 |
| Ziprasidone | 24,526 | 1,916 | 37 | 1,718 | 782 | 644 | 1,216 | 2,357 | 138 | 1 | 88 | 386 | 12,163 | 23 | 1,003 | 2,055 |
| Lumateperone | 41,789 | 2,178 | 0 | 1,676 | 758 | 733 | 1,387 | 2,405 | 656 | 0 | 0 | 16,100 | 12,746 | 25 | 1,034 | 2,091 |
| **SPAIN** | **Total** | **DM** | **Met. Synd.** | **CVD Yr1** | **CVD Yr2+** | **DM + (CVD Yr1)** | **DM + (CVD Yr2)** | **Death: CVD** | **Weight gain** | **Prolact. AE** | **QT AE.** | **On 1st line Tx** | **Relapse, 1st line** | **Discont. 1st line** | **Subs. Tx** | **Stable disease** |
| Lurasidone | 67,028 | 1,987 | 30 | 2,712 | 24,511 | 550 | 6,650 | 7,575 | 267 | 7 | 0 | 750 | 10,328 | 101 | 1,063 | 10,499 |
| Aripiprazole | 76,136 | 4,490 | 0 | 2,280 | 19,379 | 1,228 | 14,783 | 7,979 | 444 | 0 | 0 | 820 | 12,694 | 122 | 1,275 | 10,641 |
| Brexpiprazole | 75,073 | 5,260 | 0 | 2,146 | 17,881 | 1,421 | 17,045 | 8,071 | 1,016 | 1 | 0 | 330 | 10,480 | 86 | 1,045 | 10,294 |
| Cariprazine | 77,669 | 5,695 | 35 | 2,069 | 16,975 | 1,534 | 18,360 | 8,120 | 573 | 0 | 0 | 408 | 12,082 | 108 | 1,211 | 10,499 |
| Olanzapine | 85,071 | 7,387 | 2,307 | 1,873 | 14,628 | 2,074 | 25,180 | 8,896 | 2,568 | 4 | 0 | 6 | 8,842 | 81 | 897 | 10,326 |
| Paliperidone | 76,374 | 5,181 | 0 | 2,187 | 18,313 | 1,421 | 17,147 | 8,190 | 1,452 | 45 | 0 | 823 | 9,742 | 113 | 1,028 | 10,731 |
| Quetiapine | 78,557 | 4,973 | 892 | 2,260 | 19,081 | 1,400 | 17,034 | 8,347 | 1,468 | 0 | 0 | 675 | 10,824 | 95 | 1,086 | 10,422 |
| Risperidone | 75,304 | 4,736 | 0 | 2,262 | 19,193 | 1,303 | 15,736 | 8,119 | 1,394 | 35 | 0 | 273 | 10,519 | 104 | 1,078 | 10,553 |
| Ziprasidone | 69,351 | 3,177 | 47 | 2,479 | 21,729 | 866 | 10,415 | 7,670 | 148 | 3 | 362 | 952 | 9,991 | 93 | 1,024 | 10,395 |
| Lumateperone | 88,634 | 3,607 | 0 | 2,423 | 21,102 | 984 | 11,853 | 7,803 | 702 | 0 | 0 | 17,961 | 10,469 | 102 | 1,056 | 10,573 |
| **SWEDEN** | **Total** | **DM** | **Met. Synd.** | **CVD Yr1** | **CVD Yr2+** | **DM + (CVD Yr1)** | **DM + (CVD Yr2)** | **Death: CVD** | **Weight gain** | **Prolact. AE** | **QT AE.** | **On 1st line Tx** | **Relapse, 1st line** | **Discont. 1st line** | **Subs. Tx** | **Stable disease** |
| Lurasidone | 926,893 | 65,089 | 203 | 7,932 | 74,198 | 3,732 | 50,542 | 71,539 | 9,388 | 218 | 0 | 53,323 | 246,080 | 4,351 | 18,007 | 322,292 |
| Aripiprazole | 1,076,633 | 145,846 | 0 | 6,471 | 57,144 | 8,191 | 110,309 | 76,367 | 15,664 | 0 | 0 | 160 | 302,420 | 5,294 | 21,593 | 327,175 |
| Brexpiprazole | 1,071,224 | 171,089 | 0 | 6,020 | 52,163 | 9,472 | 127,351 | 77,614 | 35,912 | 29 | 0 | 4,591 | 249,603 | 3,708 | 17,693 | 315,977 |
| Cariprazine | 1,130,224 | 184,269 | 166 | 5,779 | 49,363 | 10,156 | 136,118 | 78,124 | 20,212 | 0 | 0 | 10,390 | 287,812 | 4,655 | 20,512 | 322,670 |
| Olanzapine | 1,248,390 | 240,054 | 25,081 | 5,062 | 41,247 | 13,733 | 187,566 | 86,809 | 90,710 | 138 | 0 | 11,923 | 210,693 | 3,525 | 15,193 | 316,657 |
| Paliperidone | 1,086,452 | 169,005 | 0 | 6,135 | 53,419 | 9,508 | 128,648 | 78,871 | 51,305 | 1,501 | 1 | 4,172 | 232,271 | 4,876 | 17,420 | 329,322 |
| Quetiapine | 1,105,502 | 162,445 | 9,139 | 6,358 | 55,800 | 9,383 | 128,019 | 80,402 | 51,840 | 0 | 0 | 1,705 | 257,862 | 4,122 | 18,396 | 320,032 |
| Risperidone | 1,070,426 | 154,706 | 0 | 6,387 | 56,299 | 8,739 | 118,377 | 78,014 | 49,233 | 1,175 | 0 | 92 | 250,663 | 4,488 | 18,265 | 323,986 |
| Ziprasidone | 931,621 | 103,220 | 293 | 7,156 | 65,016 | 5,800 | 77,913 | 72,789 | 5,175 | 85 | 15,440 | 332 | 238,038 | 4,012 | 17,344 | 319,008 |
| Lumateperone | 1,229,085 | 117,879 | 0 | 6,948 | 62,770 | 6,624 | 89,359 | 74,403 | 24,782 | 0 | 0 | 249,947 | 249,481 | 4,400 | 17,894 | 324,596 |
| **UK** | **Total** | **DM** | **Met. Synd.** | **CVD Yr1** | **CVD Yr2+** | **DM + (CVD Yr1)** | **DM + (CVD Yr2)** | **Death: CVD** | **Weight gain** | **Prolact. AE** | **QT AE.** | **On 1st line Tx** | **Relapse, 1st line** | **Discont. 1st line** | **Subs. Tx** | **Stable disease** |
| Lurasidone | 42,262 | 8,316 | 20 | 759 | 3,569 | 404 | 4,476 | 3,157 | 289 | 8 | 0 | 1,862 | 12,067 | 191 | 1,394 | 5,751 |
| Aripiprazole | 58,924 | 18,489 | 0 | 631 | 2,794 | 882 | 9,691 | 3,362 | 482 | 0 | 0 | 28 | 14,831 | 232 | 1,671 | 5,832 |
| Brexpiprazole | 61,399 | 21,724 | 0 | 590 | 2,562 | 1,022 | 11,212 | 3,416 | 1,103 | 1 | 0 | 357 | 12,243 | 163 | 1,369 | 5,638 |
| Cariprazine | 66,047 | 23,355 | 19 | 569 | 2,436 | 1,094 | 11,957 | 3,436 | 621 | 0 | 0 | 899 | 14,116 | 204 | 1,587 | 5,753 |
| Olanzapine | 77,727 | 30,651 | 2,404 | 507 | 2,064 | 1,499 | 16,639 | 3,826 | 2,786 | 5 | 0 | 31 | 10,332 | 155 | 1,176 | 5,654 |
| Paliperidone | 63,624 | 21,498 | 0 | 601 | 2,622 | 1,029 | 11,352 | 3,474 | 1,575 | 55 | 0 | 2,593 | 11,385 | 214 | 1,348 | 5,877 |
| Quetiapine | 62,458 | 20,679 | 895 | 623 | 2,737 | 1,017 | 11,309 | 3,545 | 1,593 | 0 | 0 | 99 | 12,646 | 181 | 1,424 | 5,709 |
| Risperidone | 59,264 | 19,686 | 0 | 623 | 2,754 | 946 | 10,449 | 3,437 | 1,512 | 43 | 0 | 132 | 12,291 | 197 | 1,413 | 5,781 |
| Ziprasidone | 48,135 | 13,084 | 31 | 690 | 3,150 | 623 | 6,839 | 3,206 | 160 | 3 | 684 | 780 | 11,674 | 176 | 1,342 | 5,693 |
| Lumateperone | 70,374 | 14,987 | 0 | 672 | 3,047 | 715 | 7,875 | 3,278 | 761 | 0 | 0 | 19,436 | 12,233 | 193 | 1,385 | 5,792 |

Table 6: Lifetime costs; patients initiating maintenance treatment.

| **FRANCE** | **Total** | **DM** | **Met. Synd.** | **CVD Yr1** | **CVD Yr2+** | **DM + (CVD Yr1)** | **DM + (CVD Yr2)** | **Death: CVD** | **Weight gain** | **Prolact. AE** | **QT AE.** | **On 1st line Tx** | **Relapse, 1st line** | **Discont. 1st line** | **Subs. Tx** | **Stable disease** |
| --- | --- | --- | --- | --- | --- | --- | --- | --- | --- | --- | --- | --- | --- | --- | --- | --- |
| Lurasidone | 71,960 | 15,510 | 60 | 4,716 | 7,318 | 2,342 | 11,574 | 6,328 | 1,639 | 26 | 0 | 1,024 | 16,443 | 111 | 1,033 | 3,837 |
| Aripiprazole | 82,795 | 19,029 | 0 | 4,425 | 6,720 | 2,854 | 14,076 | 6,448 | 2,466 | 26 | 0 | 599 | 20,855 | 136 | 1,280 | 3,882 |
| Brexpiprazole | 90,730 | 25,280 | 0 | 3,925 | 5,714 | 3,739 | 18,369 | 6,664 | 4,793 | 26 | 0 | 681 | 16,679 | 93 | 1,010 | 3,757 |
| Cariprazine | 83,487 | 20,121 | 56 | 4,336 | 6,538 | 3,011 | 14,841 | 6,485 | 2,740 | 26 | 0 | 701 | 19,480 | 119 | 1,187 | 3,845 |
| Olanzapine | 94,090 | 27,414 | 0 | 3,763 | 5,399 | 4,030 | 19,781 | 6,743 | 6,856 | 26 | 0 | 619 | 14,703 | 90 | 915 | 3,750 |
| Paliperidone | 86,969 | 22,814 | 0 | 4,125 | 6,119 | 3,389 | 16,682 | 6,584 | 5,056 | 26 | 0 | 961 | 16,146 | 124 | 1,045 | 3,898 |
| Quetiapine | 85,504 | 21,582 | 16 | 4,223 | 6,317 | 3,214 | 15,836 | 6,541 | 4,495 | 26 | 0 | 836 | 17,442 | 104 | 1,067 | 3,804 |
| Risperidone | 84,367 | 20,959 | 0 | 4,276 | 6,428 | 3,123 | 15,397 | 6,523 | 5,020 | 26 | 0 | 577 | 17,010 | 115 | 1,066 | 3,850 |
| Ziprasidone | 69,950 | 15,051 | 60 | 4,753 | 7,390 | 2,276 | 11,251 | 6,310 | 1,240 | 26 | 0 | 955 | 15,754 | 101 | 984 | 3,799 |
| Lumateperone | 93,142 | 20,450 | 6 | 4,312 | 6,493 | 3,055 | 15,061 | 6,499 | 3,448 | 26 | 0 | 11,310 | 17,452 | 112 | 1,081 | 3,837 |
| **HUNGARY** | **Total** | **DM** | **Met. Synd.** | **CVD Yr1** | **CVD Yr2+** | **DM + (CVD Yr1)** | **DM + (CVD Yr2)** | **Death: CVD** | **Weight gain** | **Prolact. AE** | **QT AE.** | **On 1st line Tx** | **Relapse, 1st line** | **Discont. 1st line** | **Subs. Tx** | **Stable disease** |
| Lurasidone | 5,109,301 | 1,718,995 | 20,198 | 85,213 | 321,896 | 83,065 | 825,127 | 508,221 | 19,006 | 2,264 | 0 | 215,355 | 860,983 | 5,882 | 160,095 | 283,000 |
| Aripiprazole | 5,839,141 | 2,118,676 | 264 | 80,540 | 297,712 | 101,806 | 1,009,251 | 518,904 | 28,508 | 2,264 | 0 | 97,547 | 1,092,192 | 7,218 | 198,332 | 285,928 |
| Brexpiprazole | 6,652,409 | 2,831,136 | 260 | 72,448 | 256,771 | 134,483 | 1,328,075 | 538,168 | 55,245 | 2,264 | 0 | 121,476 | 873,582 | 4,915 | 156,490 | 277,097 |
| Cariprazine | 6,011,674 | 2,243,262 | 19,415 | 79,102 | 290,350 | 107,586 | 1,065,873 | 522,244 | 31,662 | 2,264 | 7 | 156,229 | 1,020,184 | 6,328 | 183,823 | 283,348 |
| Olanzapine | 6,871,632 | 3,071,416 | 259 | 69,860 | 244,107 | 145,227 | 1,432,763 | 545,156 | 78,945 | 2,264 | 0 | 88,349 | 769,985 | 4,767 | 141,828 | 276,707 |
| Paliperidone | 6,279,349 | 2,545,308 | 29 | 75,756 | 273,626 | 121,383 | 1,201,174 | 530,977 | 58,266 | 2,264 | 1 | 169,298 | 845,217 | 6,611 | 161,967 | 287,473 |
| Quetiapine | 6,059,230 | 2,405,172 | 5,899 | 77,345 | 281,672 | 114,955 | 1,138,422 | 527,170 | 51,830 | 2,264 | 0 | 89,760 | 913,489 | 5,539 | 165,242 | 280,471 |
| Risperidone | 5,928,102 | 2,331,849 | 29 | 78,236 | 286,351 | 111,524 | 1,105,153 | 525,506 | 57,853 | 2,264 | 0 | 83,573 | 890,648 | 6,080 | 165,142 | 283,893 |
| Ziprasidone | 4,909,048 | 1,668,557 | 20,274 | 85,770 | 324,656 | 80,726 | 801,926 | 506,642 | 14,426 | 2,264 | 0 | 140,777 | 824,965 | 5,373 | 152,499 | 280,194 |
| Lumateperone | 7,837,639 | 2,278,476 | 2,625 | 78,746 | 288,670 | 109,162 | 1,081,530 | 523,471 | 39,792 | 2,264 | 0 | 2,062,688 | 913,869 | 5,948 | 167,529 | 282,869 |
| **ITALY** | **Total** | **DM** | **Met. Synd.** | **CVD Yr1** | **CVD Yr2+** | **DM + (CVD Yr1)** | **DM + (CVD Yr2)** | **Death: CVD** | **Weight gain** | **Prolact. AE** | **QT AE.** | **On 1st line Tx** | **Relapse, 1st line** | **Discont. 1st line** | **Subs. Tx** | **Stable disease** |
| Lurasidone | 49,590 | 12,320 | 45 | 1,265 | 13,154 | 1,009 | 13,667 | 2,519 | 773 | 27 | 0 | 926 | 1,923 | 114 | 1,054 | 793 |
| Aripiprazole | 55,156 | 15,169 | 1 | 1,164 | 11,899 | 1,229 | 16,673 | 2,597 | 1,169 | 27 | 0 | 541 | 2,439 | 140 | 1,306 | 804 |
| Brexpiprazole | 63,910 | 20,171 | 0 | 995 | 9,821 | 1,603 | 21,808 | 2,735 | 2,281 | 27 | 0 | 616 | 1,950 | 96 | 1,030 | 777 |
| Cariprazine | 56,611 | 16,048 | 37 | 1,134 | 11,521 | 1,296 | 17,587 | 2,620 | 1,300 | 27 | 0 | 634 | 2,278 | 123 | 1,210 | 796 |
| Olanzapine | 67,536 | 21,859 | 0 | 942 | 9,182 | 1,724 | 23,521 | 2,787 | 3,267 | 27 | 0 | 708 | 1,719 | 93 | 933 | 774 |
| Paliperidone | 61,088 | 18,202 | 0 | 1,062 | 10,656 | 1,457 | 19,832 | 2,686 | 2,406 | 27 | 0 | 870 | 1,889 | 128 | 1,066 | 806 |
| Quetiapine | 59,188 | 17,216 | 9 | 1,096 | 11,066 | 1,383 | 18,817 | 2,658 | 2,139 | 27 | 0 | 756 | 2,040 | 108 | 1,088 | 787 |
| Risperidone | 58,504 | 16,713 | 0 | 1,114 | 11,298 | 1,345 | 18,310 | 2,647 | 2,389 | 27 | 0 | 669 | 1,990 | 118 | 1,087 | 796 |
| Ziprasidone | 48,538 | 11,951 | 46 | 1,277 | 13,302 | 980 | 13,267 | 2,507 | 582 | 27 | 0 | 864 | 1,842 | 104 | 1,004 | 785 |
| Lumateperone | 66,641 | 16,310 | 4 | 1,126 | 11,429 | 1,316 | 17,870 | 2,630 | 1,638 | 27 | 0 | 10,238 | 2,041 | 115 | 1,103 | 794 |
| **SLOVENIA** | **Total** | **DM** | **Met. Synd.** | **CVD Yr1** | **CVD Yr2+** | **DM + (CVD Yr1)** | **DM + (CVD Yr2)** | **Death: CVD** | **Weight gain** | **Prolact. AE** | **QT AE.** | **On 1st line Tx** | **Relapse, 1st line** | **Discont. 1st line** | **Subs. Tx** | **Stable disease** |
| Lurasidone | 26,055 | 2,124 | 58 | 1,710 | 776 | 729 | 1,386 | 2,439 | 440 | 9 | 0 | 1,195 | 12,080 | 25 | 995 | 2,089 |
| Aripiprazole | 30,158 | 2,614 | 1 | 1,606 | 713 | 891 | 1,692 | 2,488 | 662 | 9 | 0 | 785 | 15,320 | 30 | 1,233 | 2,113 |
| Brexpiprazole | 28,876 | 3,481 | 1 | 1,427 | 609 | 1,172 | 2,218 | 2,575 | 1,286 | 9 | 0 | 808 | 12,252 | 21 | 973 | 2,045 |
| Cariprazine | 29,589 | 2,766 | 55 | 1,574 | 694 | 941 | 1,786 | 2,503 | 736 | 9 | 0 | 952 | 14,310 | 26 | 1,143 | 2,093 |
| Olanzapine | 28,501 | 3,771 | 1 | 1,370 | 577 | 1,262 | 2,388 | 2,606 | 1,840 | 9 | 0 | 934 | 10,801 | 20 | 881 | 2,041 |
| Paliperidone | 28,621 | 3,133 | 0 | 1,500 | 652 | 1,059 | 2,007 | 2,542 | 1,357 | 9 | 0 | 1,344 | 11,862 | 28 | 1,007 | 2,122 |
| Quetiapine | 28,602 | 2,963 | 16 | 1,535 | 672 | 1,004 | 1,904 | 2,525 | 1,206 | 9 | 0 | 834 | 12,813 | 23 | 1,027 | 2,071 |
| Risperidone | 28,198 | 2,873 | 0 | 1,554 | 684 | 974 | 1,848 | 2,517 | 1,347 | 9 | 0 | 748 | 12,496 | 25 | 1,027 | 2,096 |
| Ziprasidone | 24,932 | 2,063 | 59 | 1,722 | 783 | 709 | 1,348 | 2,432 | 333 | 9 | 0 | 863 | 11,573 | 22 | 948 | 2,068 |
| Lumateperone | 36,066 | 2,809 | 7 | 1,566 | 690 | 954 | 1,811 | 2,508 | 925 | 9 | 0 | 8,811 | 12,820 | 25 | 1,041 | 2,089 |
| **SPAIN** | **Total** | **DM** | **Met. Synd.** | **CVD Yr1** | **CVD Yr2+** | **DM + (CVD Yr1)** | **DM + (CVD Yr2)** | **Death: CVD** | **Weight gain** | **Prolact. AE** | **QT AE.** | **On 1st line Tx** | **Relapse, 1st line** | **Discont. 1st line** | **Subs. Tx** | **Stable disease** |
| Lurasidone | 71,306 | 3,517 | 73 | 2,469 | 21,575 | 978 | 11,848 | 7,914 | 472 | 45 | 0 | 812 | 9,921 | 101 | 1,016 | 10,564 |
| Aripiprazole | 76,456 | 4,324 | 1 | 2,330 | 19,942 | 1,196 | 14,460 | 8,046 | 709 | 45 | 0 | 752 | 12,584 | 123 | 1,259 | 10,683 |
| Brexpiprazole | 77,331 | 5,758 | 1 | 2,089 | 17,177 | 1,575 | 18,962 | 8,282 | 1,377 | 45 | 0 | 580 | 10,064 | 84 | 993 | 10,344 |
| Cariprazine | 76,035 | 4,575 | 70 | 2,287 | 19,445 | 1,263 | 15,263 | 8,087 | 788 | 45 | 0 | 599 | 11,754 | 108 | 1,167 | 10,584 |
| Olanzapine | 77,635 | 6,239 | 1 | 2,012 | 16,323 | 1,697 | 20,412 | 8,365 | 1,969 | 45 | 0 | 395 | 8,872 | 82 | 900 | 10,325 |
| Paliperidone | 76,374 | 5,181 | 0 | 2,187 | 18,313 | 1,421 | 17,147 | 8,190 | 1,452 | 45 | 0 | 823 | 9,742 | 113 | 1,028 | 10,731 |
| Quetiapine | 76,000 | 4,899 | 22 | 2,234 | 18,856 | 1,347 | 16,263 | 8,144 | 1,291 | 45 | 0 | 758 | 10,525 | 95 | 1,049 | 10,472 |
| Risperidone | 75,427 | 4,750 | 0 | 2,260 | 19,169 | 1,306 | 15,779 | 8,122 | 1,442 | 45 | 0 | 539 | 10,263 | 104 | 1,048 | 10,599 |
| Ziprasidone | 70,486 | 3,416 | 73 | 2,487 | 21,766 | 951 | 11,527 | 7,896 | 357 | 45 | 0 | 944 | 9,506 | 92 | 968 | 10,458 |
| Lumateperone | 83,910 | 4,645 | 10 | 2,276 | 19,329 | 1,281 | 15,471 | 8,100 | 991 | 45 | 0 | 9,505 | 10,530 | 102 | 1,064 | 10,561 |
| **SWEDEN** | **Total** | **DM** | **Met. Synd.** | **CVD Yr1** | **CVD Yr2+** | **DM + (CVD Yr1)** | **DM + (CVD Yr2)** | **Death: CVD** | **Weight gain** | **Prolact. AE** | **QT AE.** | **On 1st line Tx** | **Relapse, 1st line** | **Discont. 1st line** | **Subs. Tx** | **Stable disease** |
| Lurasidone | 989,858 | 114,715 | 488 | 7,094 | 64,296 | 6,571 | 89,077 | 75,442 | 16,558 | 1,501 | 0 | 31,874 | 236,466 | 4,348 | 17,218 | 324,211 |
| Aripiprazole | 1,083,370 | 140,915 | 1 | 6,622 | 58,868 | 8,009 | 108,418 | 77,052 | 24,975 | 1,501 | 0 | 2,054 | 299,834 | 5,336 | 21,331 | 328,452 |
| Brexpiprazole | 1,107,355 | 187,335 | 1 | 5,813 | 49,756 | 10,485 | 141,627 | 79,939 | 48,632 | 1,501 | 0 | 4,601 | 239,756 | 3,646 | 16,830 | 317,433 |
| Cariprazine | 1,079,753 | 149,040 | 432 | 6,478 | 57,224 | 8,450 | 114,328 | 77,552 | 27,760 | 1,501 | 5 | 7,269 | 280,055 | 4,684 | 19,773 | 325,202 |
| Olanzapine | 1,127,000 | 203,116 | 1 | 5,551 | 46,904 | 11,298 | 152,607 | 80,990 | 69,616 | 1,501 | 0 | 8,645 | 211,388 | 3,529 | 15,249 | 316,603 |
| Paliperidone | 1,086,452 | 169,005 | 0 | 6,135 | 53,419 | 9,508 | 128,648 | 78,871 | 51,305 | 1,501 | 1 | 4,172 | 232,271 | 4,876 | 17,420 | 329,322 |
| Quetiapine | 1,075,033 | 159,857 | 105 | 6,294 | 55,212 | 9,020 | 122,100 | 78,299 | 45,608 | 1,501 | 0 | 2,911 | 250,771 | 4,103 | 17,773 | 321,480 |
| Risperidone | 1,070,048 | 155,209 | 0 | 6,379 | 56,213 | 8,765 | 118,738 | 78,053 | 50,940 | 1,501 | 0 | 2,033 | 244,610 | 4,494 | 17,762 | 325,350 |
| Ziprasidone | 935,980 | 111,310 | 497 | 7,153 | 64,951 | 6,387 | 86,558 | 75,203 | 12,504 | 1,501 | 0 | 2,177 | 226,530 | 3,975 | 16,400 | 320,834 |
| Lumateperone | 1,180,117 | 151,468 | 48 | 6,438 | 56,811 | 8,575 | 116,066 | 77,741 | 34,953 | 1,501 | 0 | 128,906 | 250,939 | 4,400 | 18,019 | 324,252 |
| **UK** | **Total** | **DM** | **Met. Synd.** | **CVD Yr1** | **CVD Yr2+** | **DM + (CVD Yr1)** | **DM + (CVD Yr2)** | **Death: CVD** | **Weight gain** | **Prolact. AE** | **QT AE.** | **On 1st line Tx** | **Relapse, 1st line** | **Discont. 1st line** | **Subs. Tx** | **Stable disease** |
| Lurasidone | 52,063 | 14,577 | 52 | 686 | 3,122 | 709 | 7,846 | 3,326 | 510 | 55 | 0 | 2,277 | 11,594 | 191 | 1,332 | 5,786 |
| Aripiprazole | 59,733 | 17,896 | 0 | 645 | 2,874 | 864 | 9,546 | 3,395 | 768 | 55 | 0 | 1,246 | 14,703 | 234 | 1,651 | 5,855 |
| Brexpiprazole | 65,858 | 23,816 | 0 | 572 | 2,454 | 1,135 | 12,490 | 3,519 | 1,494 | 55 | 0 | 1,437 | 11,759 | 160 | 1,302 | 5,665 |
| Cariprazine | 60,670 | 18,927 | 48 | 632 | 2,799 | 912 | 10,067 | 3,416 | 854 | 55 | 0 | 1,691 | 13,734 | 206 | 1,530 | 5,799 |
| Olanzapine | 67,802 | 25,862 | 0 | 549 | 2,320 | 1,226 | 13,484 | 3,566 | 2,137 | 55 | 0 | 1,251 | 10,366 | 155 | 1,180 | 5,653 |
| Paliperidone | 63,624 | 21,498 | 0 | 601 | 2,622 | 1,029 | 11,352 | 3,474 | 1,575 | 55 | 0 | 2,593 | 11,385 | 214 | 1,348 | 5,877 |
| Quetiapine | 61,189 | 20,330 | 11 | 615 | 2,704 | 976 | 10,771 | 3,449 | 1,401 | 55 | 0 | 1,288 | 12,298 | 180 | 1,375 | 5,736 |
| Risperidone | 60,289 | 19,752 | 0 | 623 | 2,750 | 949 | 10,482 | 3,439 | 1,564 | 55 | 0 | 1,305 | 11,993 | 197 | 1,374 | 5,805 |
| Ziprasidone | 50,061 | 14,137 | 53 | 692 | 3,153 | 689 | 7,619 | 3,315 | 386 | 55 | 0 | 1,686 | 11,108 | 174 | 1,269 | 5,727 |
| Lumateperone | 69,145 | 19,249 | 5 | 628 | 2,779 | 927 | 10,229 | 3,425 | 1,074 | 55 | 0 | 11,097 | 12,305 | 193 | 1,394 | 5,785 |

CVD: cardiovascular disease. DM: Diabetes mellitus type 2. Met. Synd.: Metabolic syndrome. Prolact. AE: Prolactin-related adverse events. QT AE.: Adverse events due to QTc interval prolongation. Subs.: Subsequent. Tx: Treatment. Discont.: Discontinuation. Yr: Year.

Table 7: Probability that the treatment has the lowest lifetime costs: acute population.

|  | **France (€)** | **Hungary (HUF)** | **Italy** | **Slovenia (€)** | **Spain (€)** | **Sweden (SEK)** | **UK** |
| --- | --- | --- | --- | --- | --- | --- | --- |
| **(€)** | **(£)** |
| Lurasidone | 68.5% | 71.0% | 77.8% | 35.4% | 54.8% | 38.4% | 68.1% |
| Ziprasidone | 26.1% | 23.4% | 19.2% | 34.0% | 25.2% | 35.1% | 23.8% |
| Risperidone | 0.6% | 1.7% | 0.3% | 8.6% | 5.1% | 5.4% | 2.0% |
| Brexpiprazole | 0.7% | 0.8% | 0.5% | 6.8% | 4.5% | 6.1% | 1.5% |
| Aripiprazole | 2.6% | 1.9% | 1.8% | 4.8% | 2.8% | 6.4% | 2.6% |
| Paliperidone | 0.6% | 0.5% | 0.0% | 5.2% | 2.7% | 3.4% | 0.4% |
| Cariprazine | 0.6% | 0.3% | 0.1% | 2.5% | 3.0% | 2.0% | 0.5% |
| Quetiapine | 0.3% | 0.4% | 0.3% | 2.5% | 1.9% | 3.0% | 1.1% |
| Olanzapine | 0.0% | 0.0% | 0.0% | 0.2% | 0.0% | 0.2% | 0.0% |
| Lumateperone | 0.0% | 0.0% | 0.0% | 0.0% | 0.0% | 0.0% | 0.0% |

Table 8: Results from deterministic sensitivity analyses (DSAs)

| **France** | **DSA 1** | **DSA 2** | **DSA 3** | **DSA 4** | **DSA 5** | **DSA 6** | **DSA 7** | **DSA 8** |
| --- | --- | --- | --- | --- | --- | --- | --- | --- |
| Lurasidone | 60,703 | 80,331 | 54,353 | 60,543 | 62,636 | 61,849 | 54,753 | 70,715 |
| Ziprasidone | 67,554 | 91,286 | 61,810 | 67,736 | 71,208 | 69,612 | 58,947 | 79,850 |
| Aripiprazole | 82,098 | 92,122 | 74,389 | 82,456 | 87,838 | 84,881 | 70,280 | 96,985 |
| Risperidone | 83,704 | 100,619 | 77,871 | 84,369 | 90,617 | 86,748 | 71,227 | 99,692 |
| Brexpiprazole | 86,204 | 96,786 | 79,386 | 85,847 | 92,462 | 88,494 | 71,936 | 101,718 |
| Paliperidone | 86,345 | 100,379 | 81,328 | 87,183 | 93,997 | 89,749 | 73,076 | 103,219 |
| Quetiapine | 87,802 | 105,615 | 82,351 | 89,127 | 95,608 | 91,586 | 74,186 | 104,792 |
| Cariprazine | 89,771 | 102,942 | 82,401 | 90,029 | 96,846 | 92,950 | 75,421 | 106,380 |
| Lumateperone | 94,862 | 107,669 | 87,866 | 94,218 | 98,667 | 96,180 | 84,109 | 107,349 |
| Olanzapine | 108,105 | 119,840 | 103,262 | 108,645 | 118,353 | 111,901 | 87,046 | 128,004 |
| **Hungary** | **DSA 1** | **DSA 2** | **DSA 3** | **DSA 4** | **DSA 5** | **DSA 6** | **DSA 7** | **DSA 8** |
| Lurasidone | 4,032,222 | 5,133,148 | 5,524,768 | 4,057,154 | 4,434,087 | 3,978,818 | 3,432,235 | 4,840,709 |
| Ziprasidone | 4,683,124 | 6,103,052 | 6,168,262 | 4,715,487 | 5,342,584 | 4,625,693 | 3,783,024 | 5,776,973 |
| Risperidone | 5,838,758 | 6,784,776 | 7,383,708 | 6,051,231 | 6,894,114 | 5,764,248 | 4,531,801 | 7,308,011 |
| Aripiprazole | 5,843,979 | 6,380,297 | 7,542,063 | 5,923,605 | 6,809,348 | 5,765,347 | 4,609,746 | 7,248,052 |
| Brexpiprazole | 6,249,800 | 6,831,178 | 7,720,514 | 6,358,731 | 7,337,526 | 6,110,301 | 4,791,003 | 7,760,899 |
| Paliperidone | 6,246,173 | 7,003,672 | 7,759,692 | 6,475,958 | 7,402,184 | 6,171,479 | 4,845,988 | 7,817,019 |
| Quetiapine | 6,328,517 | 7,306,257 | 7,918,627 | 6,584,880 | 7,430,031 | 6,286,362 | 4,745,398 | 7,838,971 |
| Cariprazine | 6,748,703 | 7,475,279 | 8,386,022 | 6,837,946 | 7,936,097 | 6,636,983 | 5,242,345 | 8,380,043 |
| Olanzapine | 8,415,839 | 8,988,036 | 9,812,839 | 8,772,798 | 9,930,448 | 8,286,116 | 5,868,970 | 10,297,612 |
| Lumateperone | 8,909,332 | 9,378,410 | 10,388,376 | 8,964,284 | 9,645,980 | 8,793,261 | 7,837,445 | 10,061,620 |
| **Italy** | **DSA 1** | **DSA 2** | **DSA 3** | **DSA 4** | **DSA 5** | **DSA 6** | **DSA 7** | **DSA 8** |
| Lurasidone | 39,966 | 43,887 | 50,576 | 39,562 | 40,763 | 39,610 | 35,242 | 44,674 |
| Ziprasidone | 46,094 | 51,886 | 56,715 | 46,070 | 46,457 | 45,679 | 39,185 | 51,753 |
| Aripiprazole | 54,634 | 56,150 | 67,076 | 54,398 | 54,076 | 54,006 | 45,013 | 61,272 |
| Risperidone | 57,902 | 60,650 | 69,090 | 56,802 | 56,890 | 57,365 | 47,619 | 64,949 |
| Brexpiprazole | 59,884 | 61,390 | 70,290 | 58,523 | 58,042 | 58,562 | 48,392 | 66,461 |
| Paliperidone | 60,678 | 62,961 | 71,589 | 59,629 | 59,459 | 60,144 | 49,739 | 68,094 |
| Cariprazine | 61,415 | 63,701 | 73,340 | 60,964 | 59,962 | 60,419 | 49,832 | 68,620 |
| Quetiapine | 60,822 | 63,871 | 72,557 | 60,072 | 59,996 | 60,641 | 49,513 | 68,552 |
| Lumateperone | 68,996 | 69,341 | 79,363 | 67,793 | 68,187 | 67,907 | 60,385 | 74,414 |
| Olanzapine | 78,279 | 79,157 | 88,164 | 75,807 | 74,982 | 77,002 | 61,558 | 86,799 |
| **Slovenia** | **DSA 1** | **DSA 2** | **DSA 3** | **DSA 4** | **DSA 5** | **DSA 6** | **DSA 7** | **DSA 8** |
| Lurasidone | 24,498 | 38,189 | 20,952 | 24,436 | 24,782 | 24,331 | 23,660 | 26,305 |
| Ziprasidone | 24,499 | 40,221 | 21,187 | 24,513 | 25,095 | 24,360 | 23,274 | 26,619 |
| Brexpiprazole | 28,022 | 36,067 | 24,281 | 27,832 | 29,198 | 27,679 | 25,930 | 30,596 |
| Risperidone | 27,824 | 40,294 | 24,316 | 27,800 | 29,170 | 27,691 | 26,042 | 30,553 |
| Paliperidone | 28,492 | 38,759 | 25,497 | 28,497 | 29,984 | 28,379 | 26,600 | 31,354 |
| Aripiprazole | 29,610 | 37,130 | 24,851 | 29,627 | 30,670 | 29,449 | 27,913 | 32,137 |
| Quetiapine | 29,483 | 42,412 | 25,905 | 29,584 | 30,879 | 29,489 | 26,945 | 32,256 |
| Cariprazine | 30,396 | 39,980 | 25,930 | 30,380 | 31,704 | 30,177 | 28,320 | 33,142 |
| Olanzapine | 32,162 | 41,729 | 29,488 | 31,973 | 33,922 | 31,917 | 27,397 | 35,144 |
| Lumateperone | 41,942 | 51,736 | 38,218 | 41,729 | 42,628 | 41,603 | 40,362 | 44,079 |
| **Spain** | **DSA 1** | **DSA 2** | **DSA 3** | **DSA 4** | **DSA 5** | **DSA 6** | **DSA 7** | **DSA 8** |
| Lurasidone | 67,092 | 80,026 | 58,594 | 66,866 | 69,866 | 67,400 | 65,561 | 80,729 |
| Ziprasidone | 69,299 | 84,206 | 61,065 | 69,262 | 73,189 | 69,763 | 66,982 | 83,617 |
| Brexpiprazole | 75,234 | 82,854 | 66,706 | 74,457 | 81,478 | 75,559 | 70,826 | 90,733 |
| Risperidone | 75,159 | 86,764 | 66,788 | 74,459 | 81,513 | 75,775 | 71,124 | 90,903 |
| Aripiprazole | 76,042 | 83,464 | 66,972 | 75,867 | 81,585 | 76,599 | 72,403 | 91,379 |
| Paliperidone | 76,177 | 85,848 | 67,979 | 75,494 | 83,022 | 76,861 | 71,844 | 92,226 |
| Cariprazine | 77,613 | 86,789 | 68,750 | 77,322 | 84,196 | 78,173 | 73,155 | 93,496 |
| Quetiapine | 78,210 | 90,218 | 70,027 | 77,667 | 84,906 | 79,036 | 72,841 | 94,388 |
| Olanzapine | 85,019 | 93,711 | 77,139 | 83,513 | 93,919 | 85,626 | 75,785 | 102,312 |
| Lumateperone | 88,869 | 97,695 | 80,121 | 88,208 | 93,350 | 89,061 | 85,752 | 103,327 |
| **Sweden** | **DSA 1** | **DSA 2** | **DSA 3** | **DSA 4** | **DSA 5** | **DSA 6** | **DSA 7** | **DSA 8** |
| Lurasidone | 928,617 | 1,250,569 | 532,824 | 918,329 | 924,972 | 926,984 | 884,766 | 986,065 |
| Ziprasidone | 930,324 | 1,310,166 | 544,735 | 926,900 | 932,716 | 931,901 | 867,260 | 1,001,458 |
| Risperidone | 1,066,352 | 1,362,987 | 672,403 | 1,025,514 | 1,079,315 | 1,070,897 | 975,000 | 1,160,381 |
| Brexpiprazole | 1,075,653 | 1,273,274 | 680,101 | 1,038,465 | 1,080,612 | 1,071,779 | 969,861 | 1,163,508 |
| Aripiprazole | 1,074,164 | 1,268,866 | 646,488 | 1,062,344 | 1,082,477 | 1,077,098 | 987,432 | 1,160,612 |
| Paliperidone | 1,080,933 | 1,331,042 | 694,761 | 1,039,650 | 1,096,723 | 1,086,988 | 983,974 | 1,180,458 |
| Quetiapine | 1,095,721 | 1,405,118 | 706,467 | 1,058,212 | 1,114,662 | 1,105,989 | 994,535 | 1,196,766 |
| Cariprazine | 1,128,754 | 1,367,028 | 711,978 | 1,111,786 | 1,139,585 | 1,130,864 | 1,023,346 | 1,224,552 |
| Lumateperone | 1,235,671 | 1,479,839 | 831,259 | 1,206,478 | 1,233,073 | 1,229,400 | 1,155,443 | 1,305,536 |
| Olanzapine | 1,246,998 | 1,472,313 | 878,998 | 1,165,642 | 1,265,902 | 1,249,167 | 1,085,594 | 1,360,467 |
| **UK** | **DSA 1** | **DSA 2** | **DSA 3** | **DSA 4** | **DSA 5** | **DSA 6** | **DSA 7** | **DSA 8** |
| Lurasidone | 42,386 | 57,222 | 37,907 | 42,713 | 43,522 | 42,357 | 37,218 | 47,905 |
| Ziprasidone | 48,016 | 66,187 | 43,913 | 48,384 | 50,117 | 48,483 | 40,489 | 55,457 |
| Aripiprazole | 58,727 | 66,534 | 53,659 | 59,674 | 61,851 | 59,502 | 48,452 | 68,224 |
| Risperidone | 58,998 | 71,993 | 54,833 | 61,620 | 62,536 | 59,807 | 48,098 | 69,092 |
| Brexpiprazole | 61,706 | 69,969 | 56,994 | 63,117 | 64,904 | 62,070 | 49,457 | 71,773 |
| Quetiapine | 61,814 | 75,374 | 57,916 | 64,940 | 65,815 | 63,033 | 49,780 | 72,484 |
| Paliperidone | 63,258 | 73,853 | 59,483 | 66,080 | 67,184 | 64,252 | 51,630 | 74,050 |
| Cariprazine | 65,930 | 76,091 | 61,022 | 67,015 | 69,708 | 66,852 | 53,452 | 76,889 |
| Lumateperone | 70,817 | 80,504 | 65,961 | 71,560 | 72,792 | 70,741 | 61,667 | 78,470 |
| Olanzapine | 77,628 | 86,628 | 73,946 | 82,070 | 82,647 | 78,663 | 59,354 | 90,700 |

For descriptions of the deterministic analyses, see the main manuscript.
